# Supplementary material
Source: PubMed Central journal article supplement (PMC1955815)

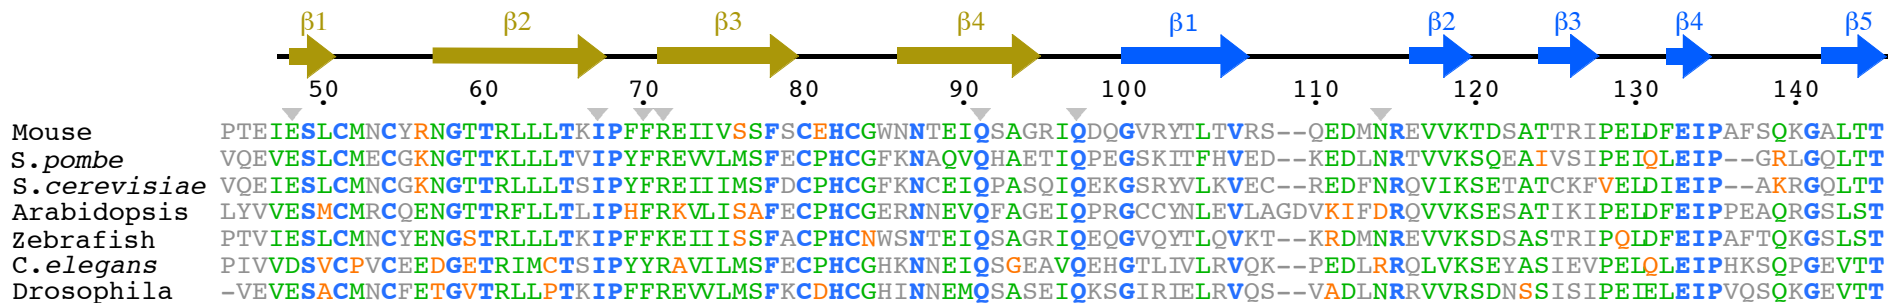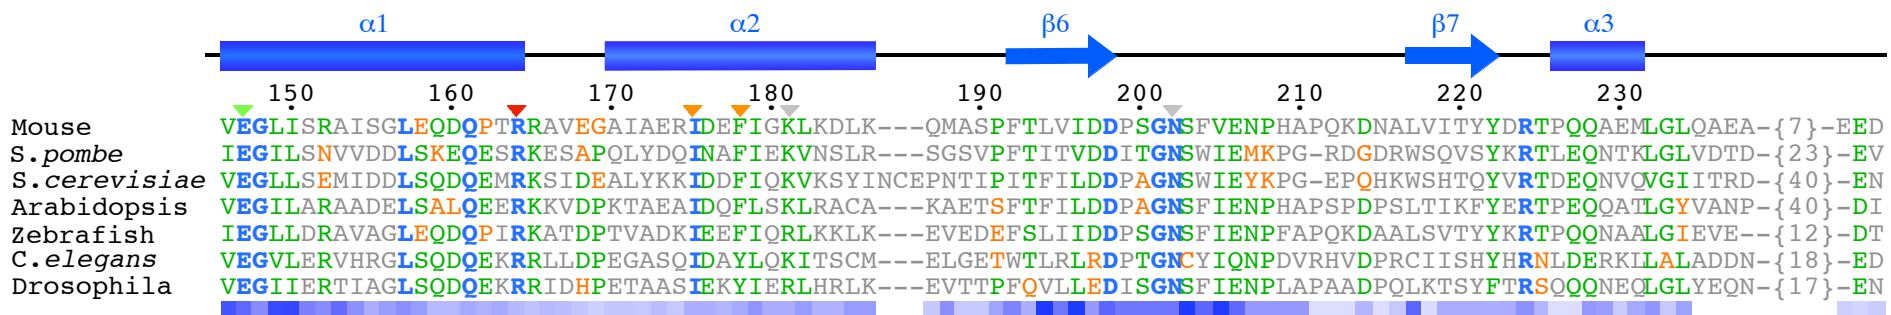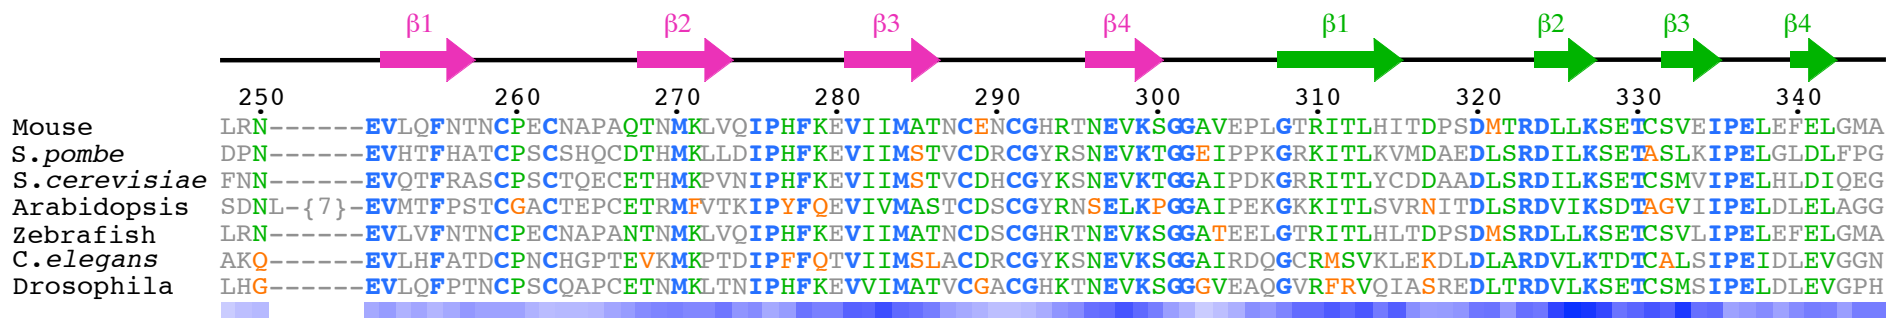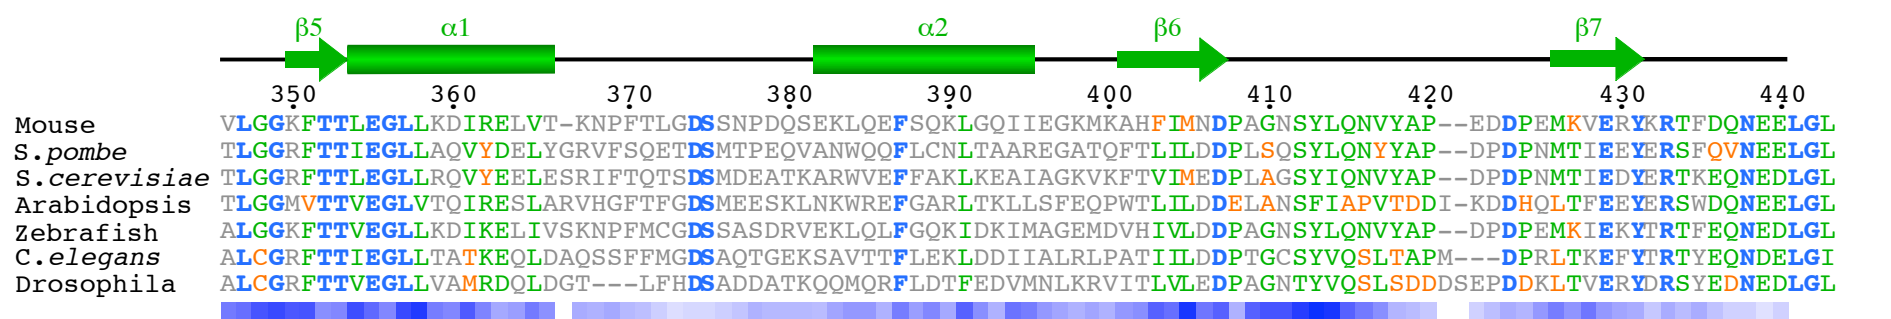

Supplement: pnas_0704915104_1.pdf [file pnas_0704915104_1.pdf]

**A**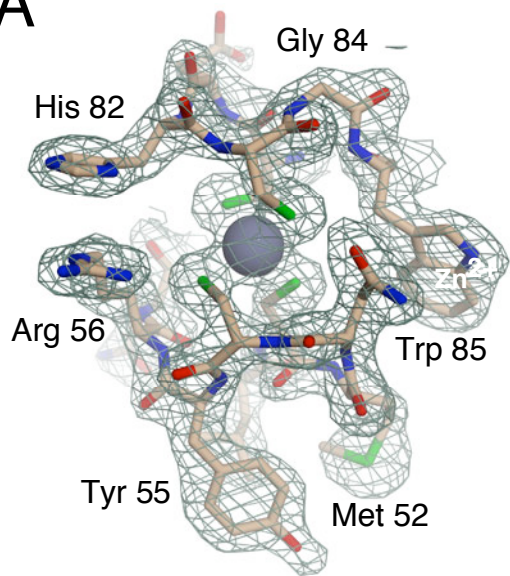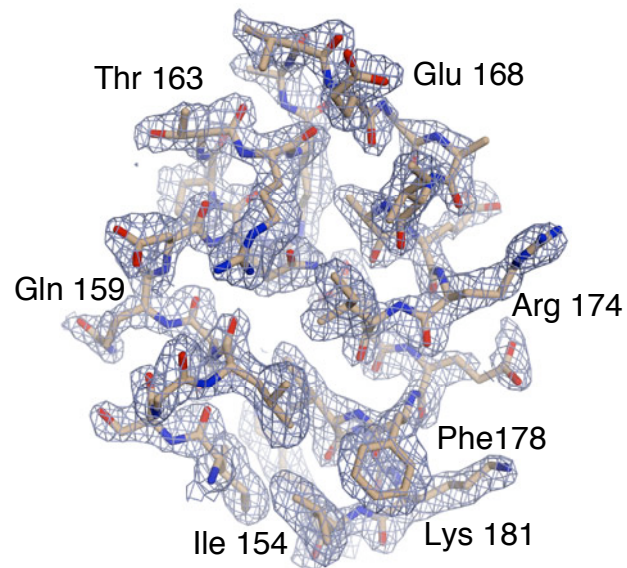**C**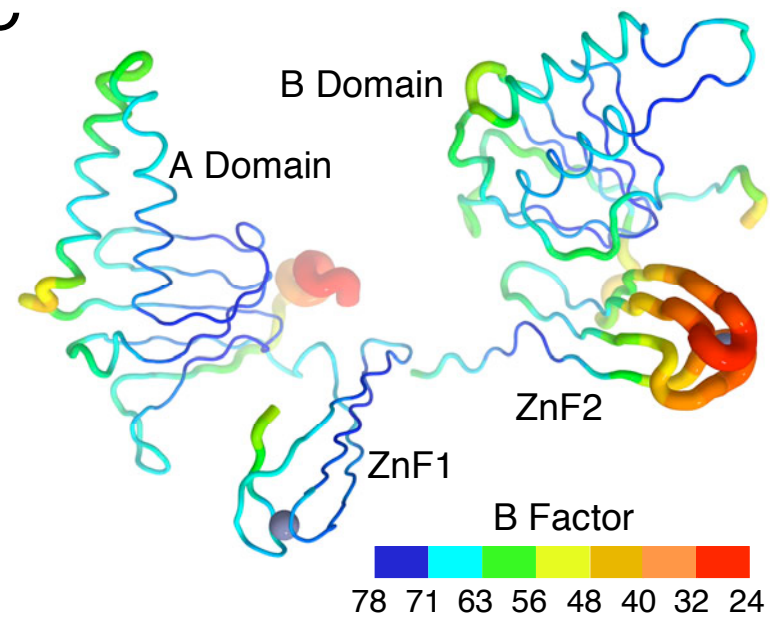**B**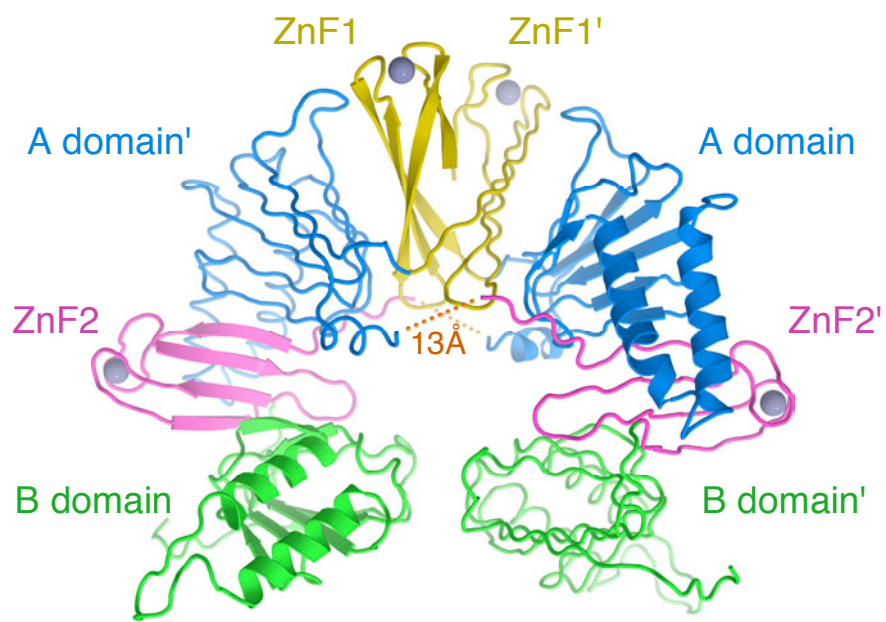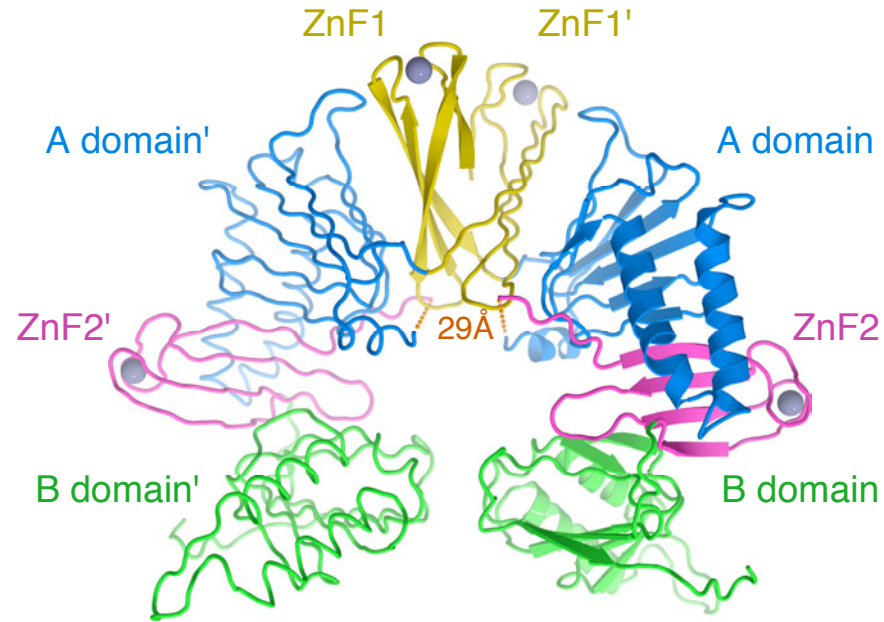

Supplement: pnas_0704915104_2.pdf [file pnas_0704915104_2.pdf]

A

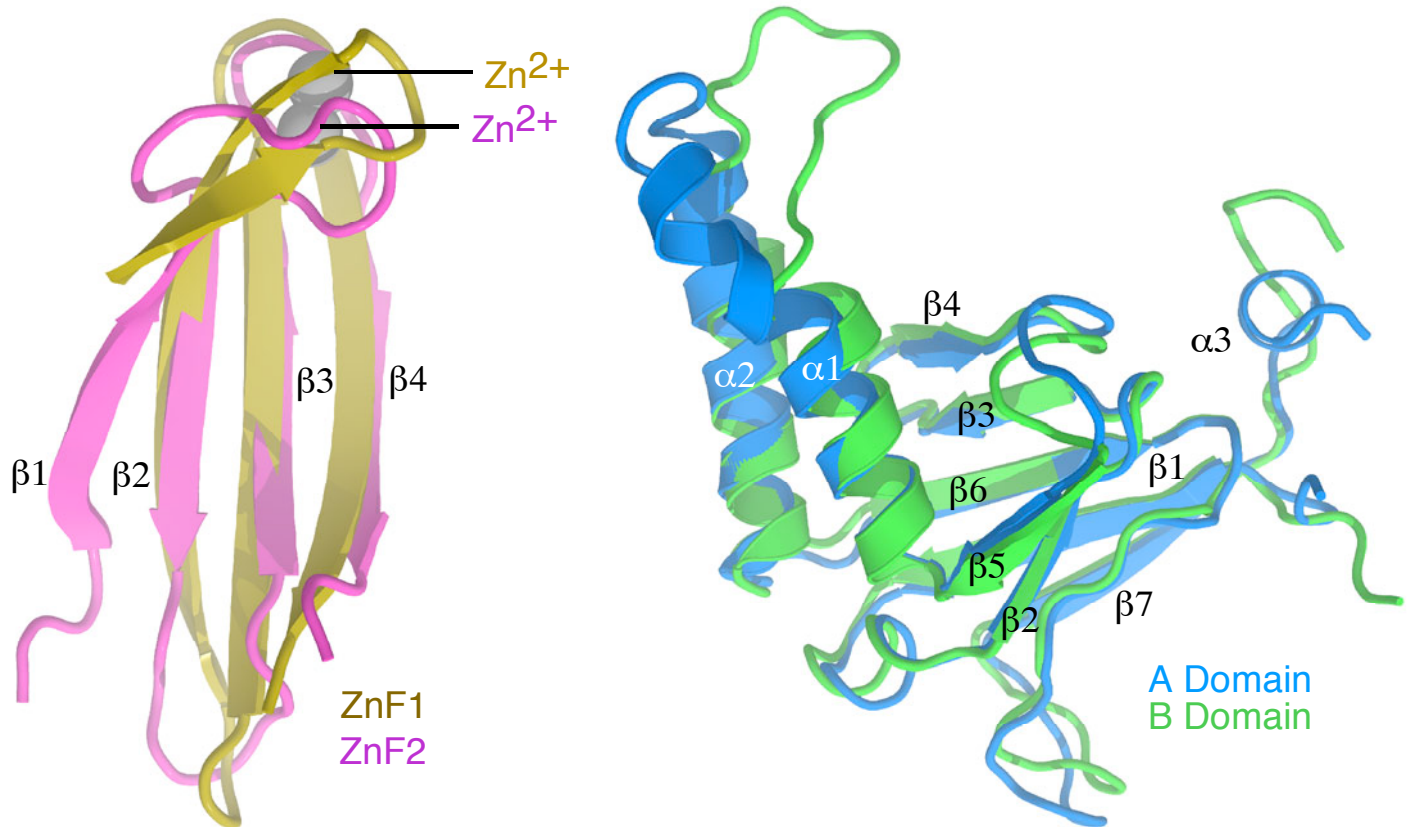

B

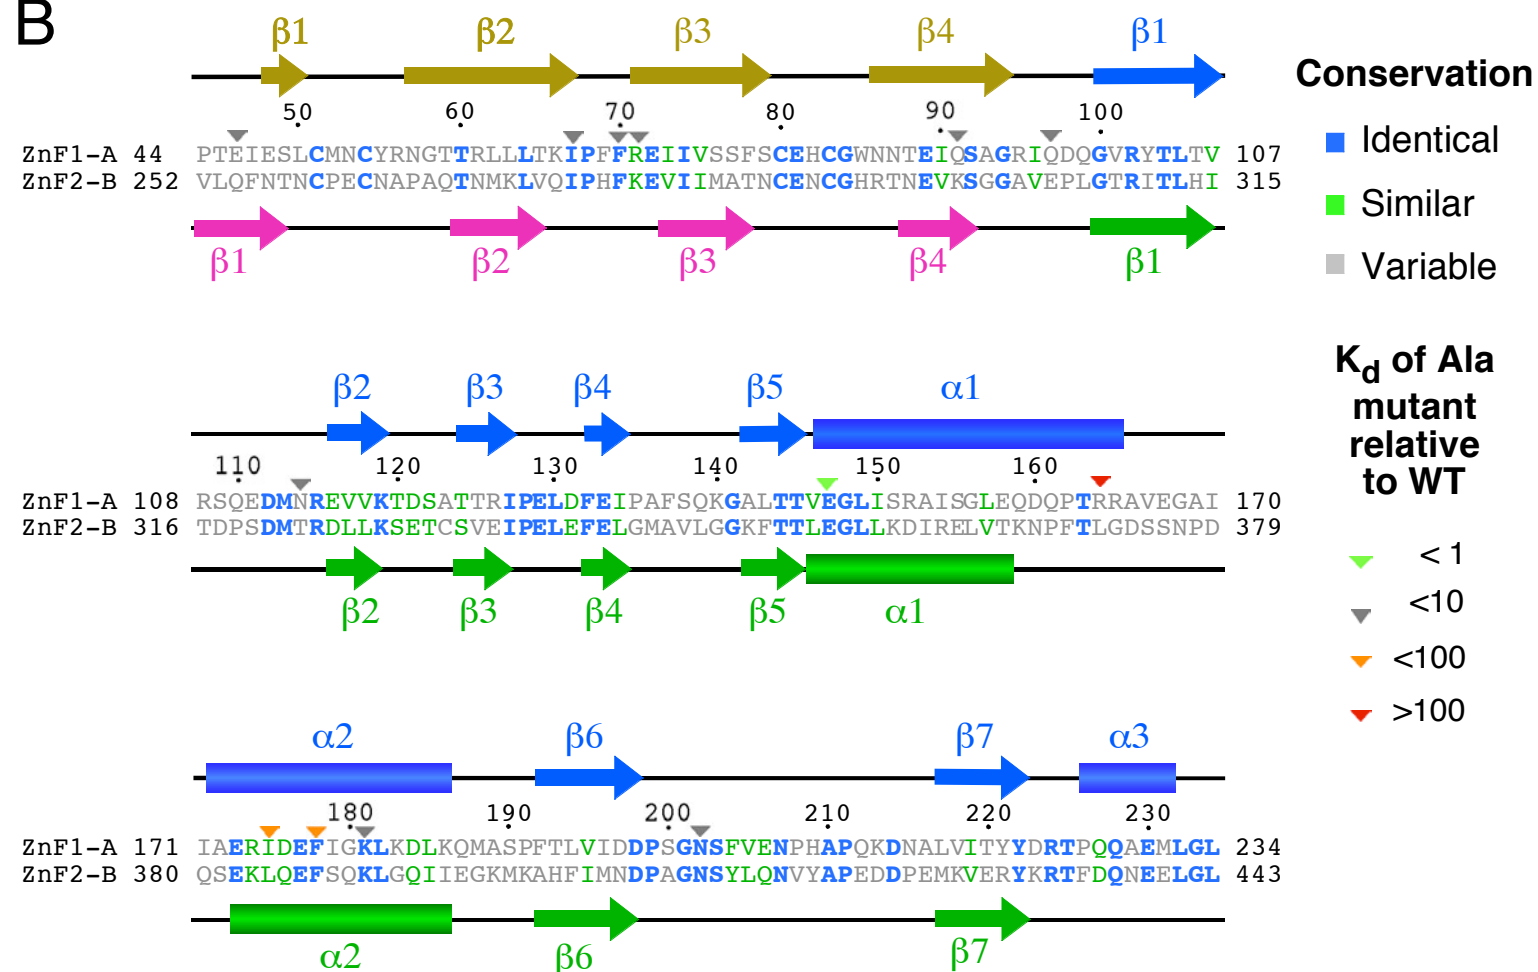

Supplement: pnas_0704915104_3.pdf [file pnas_0704915104_3.pdf]

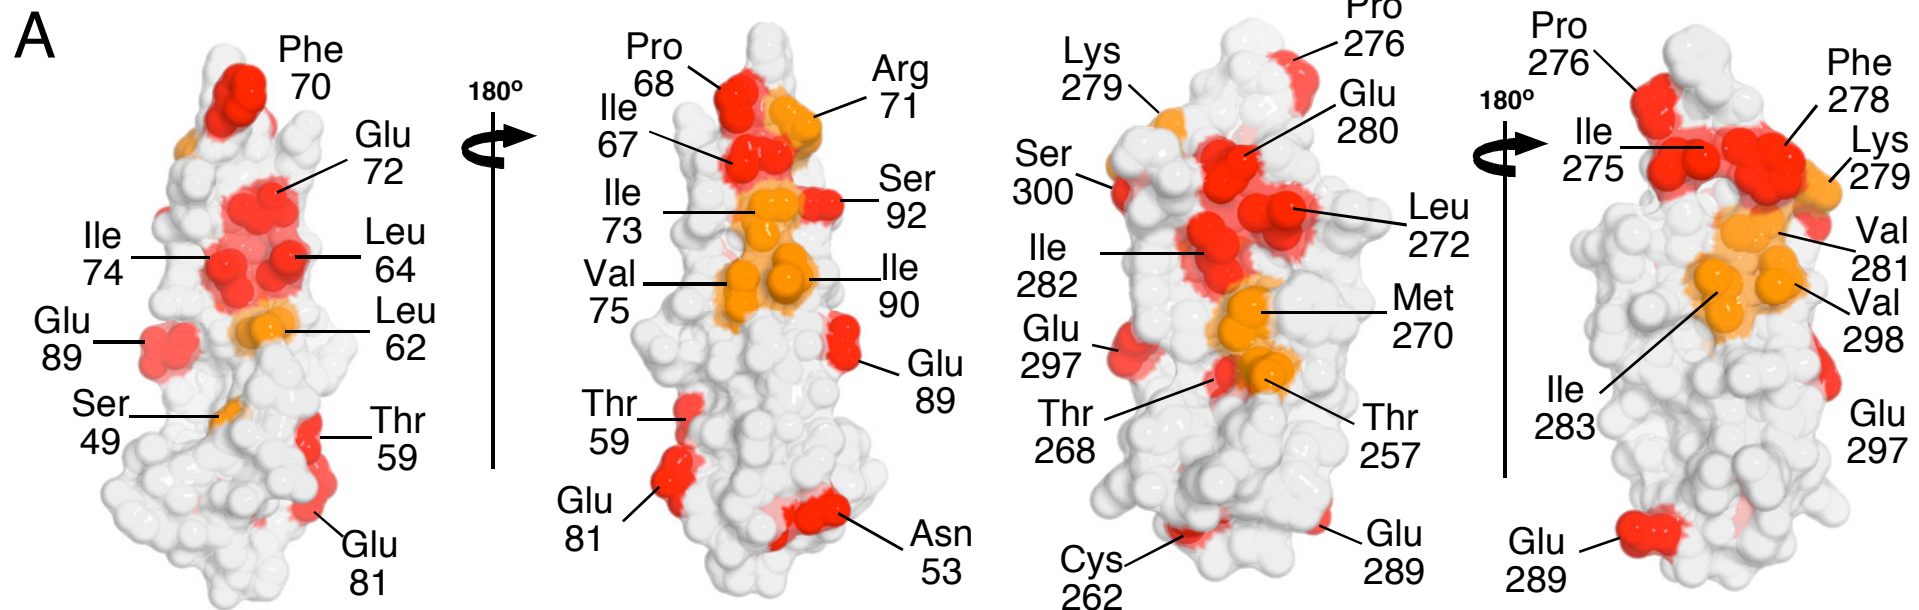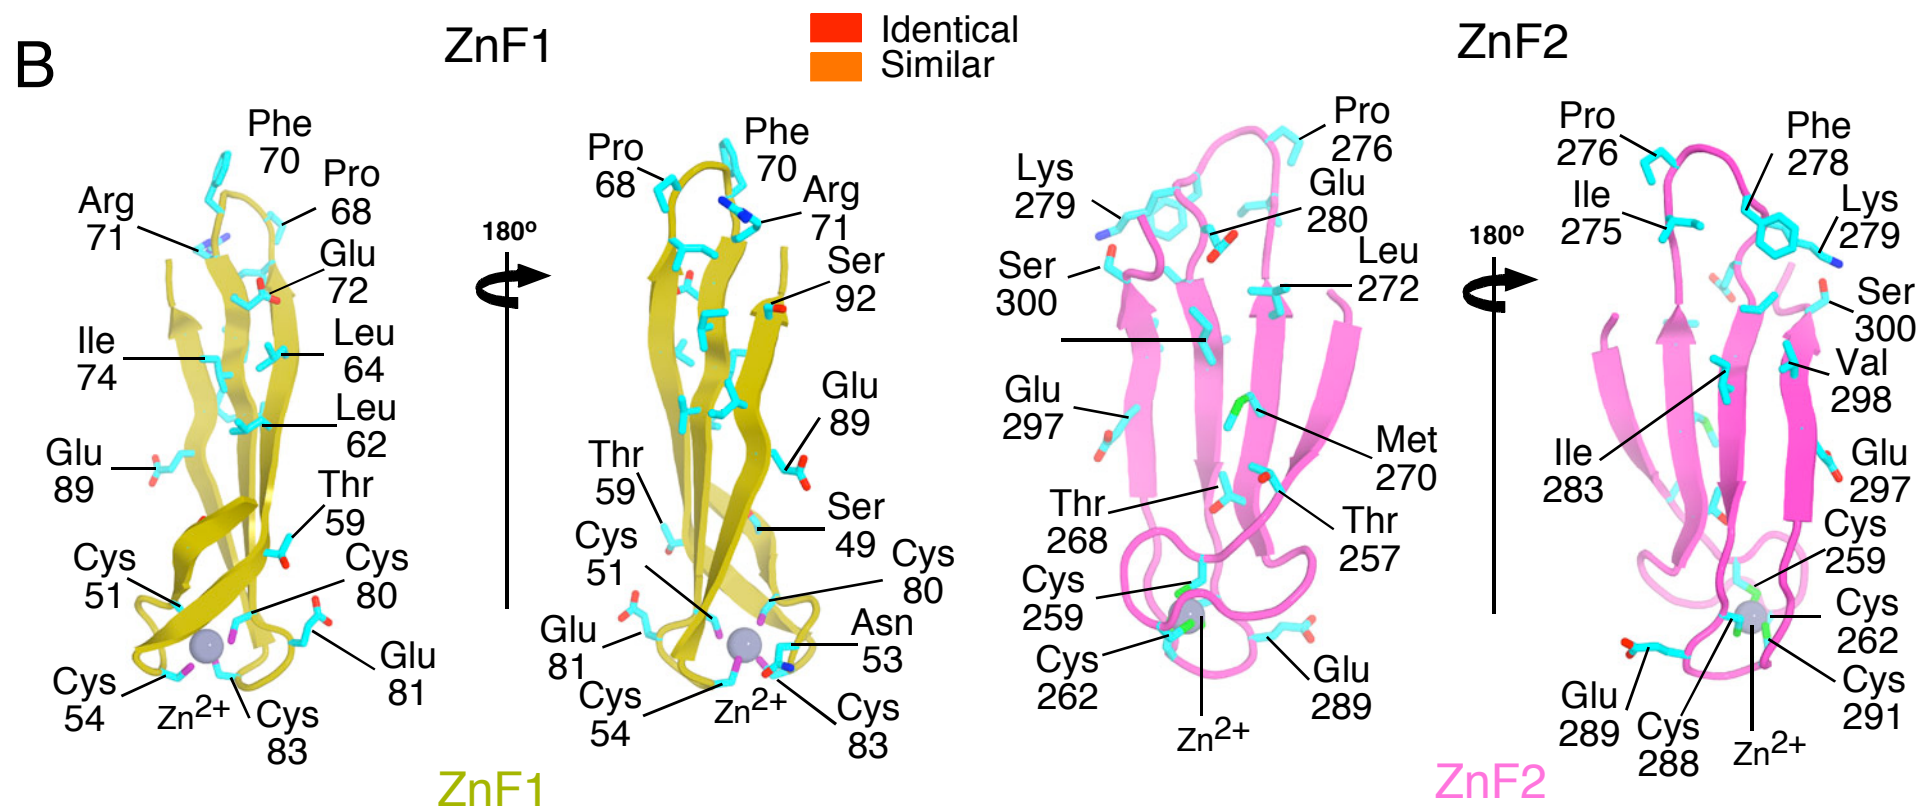

Supplement: pnas_0704915104_4.pdf [file pnas_0704915104_4.pdf]

# ZnF2-B domain

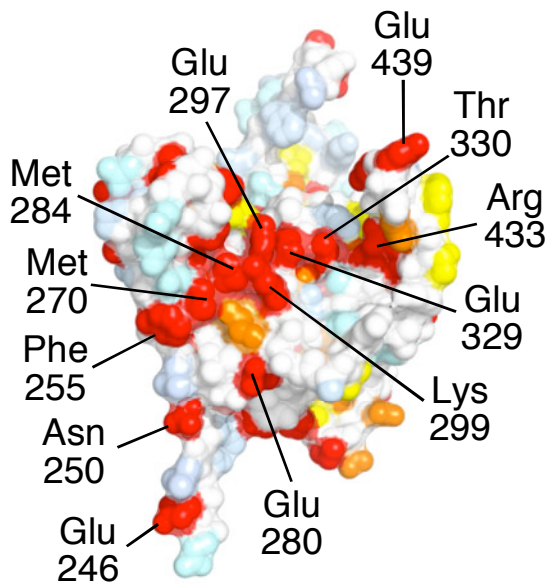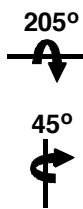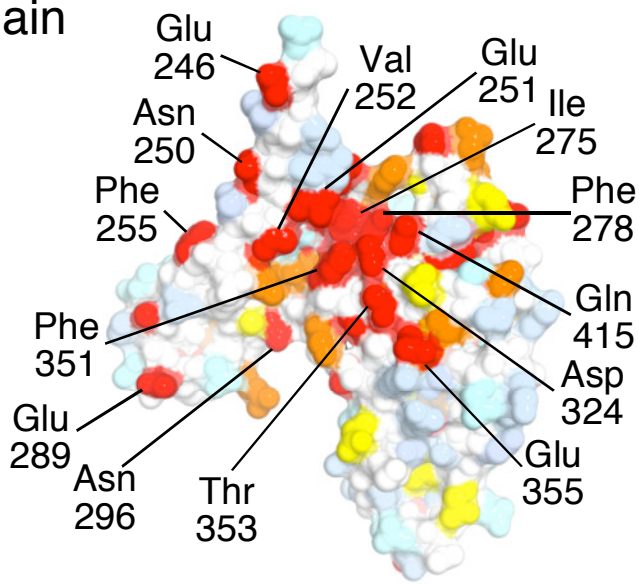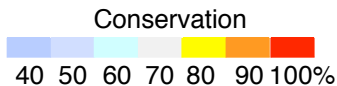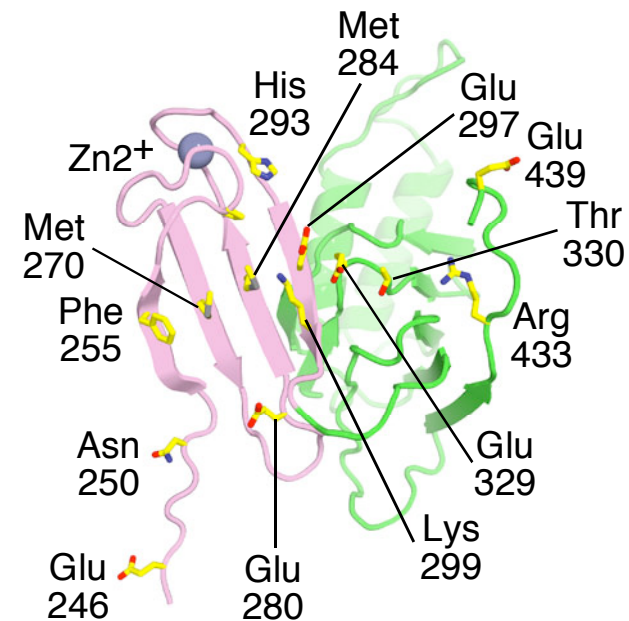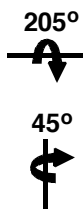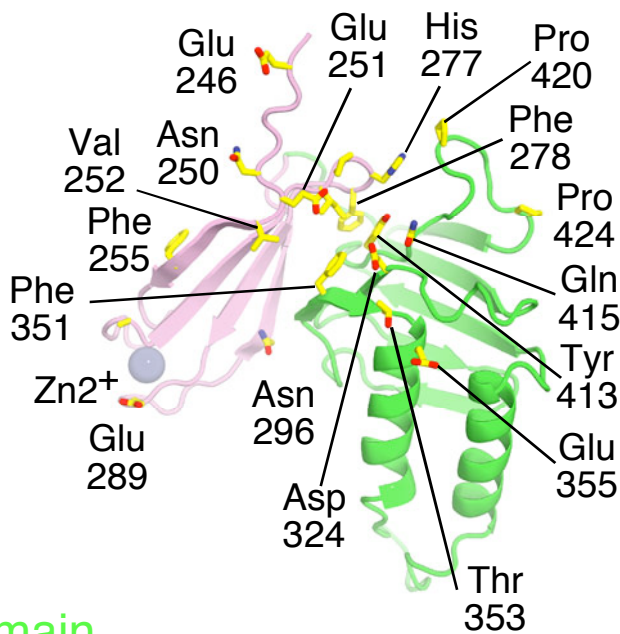

# ZnF2-B domain

Supplement: pnas_0704915104_5.pdf [file pnas_0704915104_5.pdf]

**A**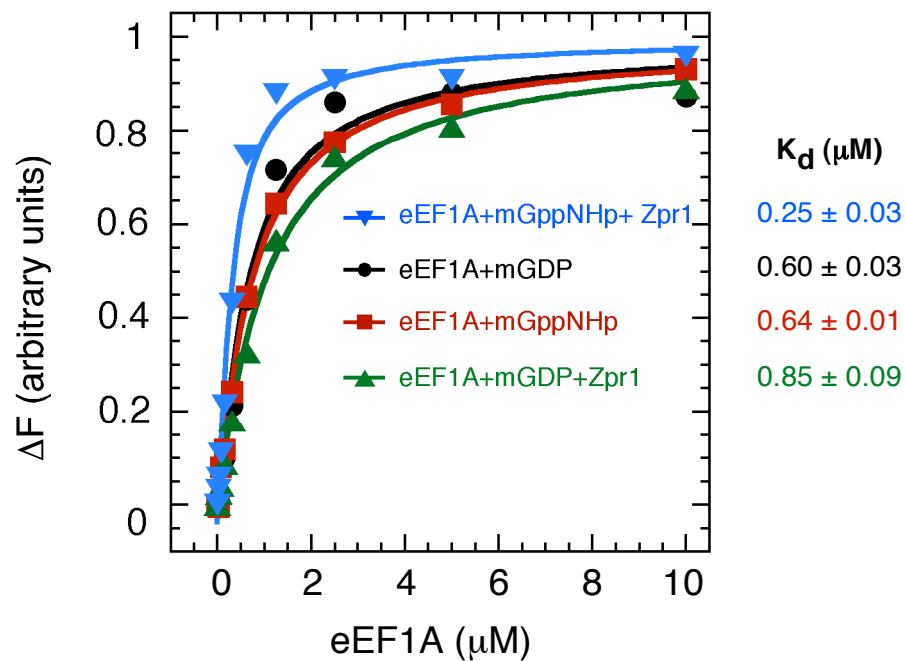**B**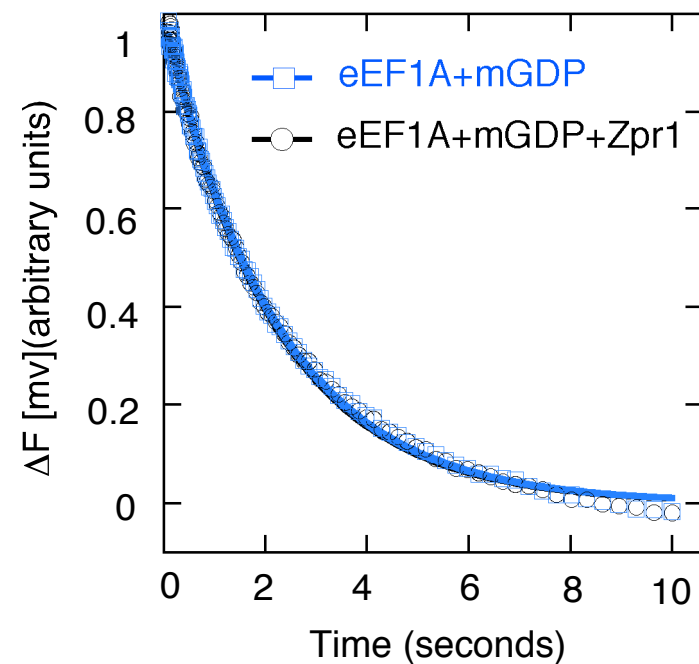**C**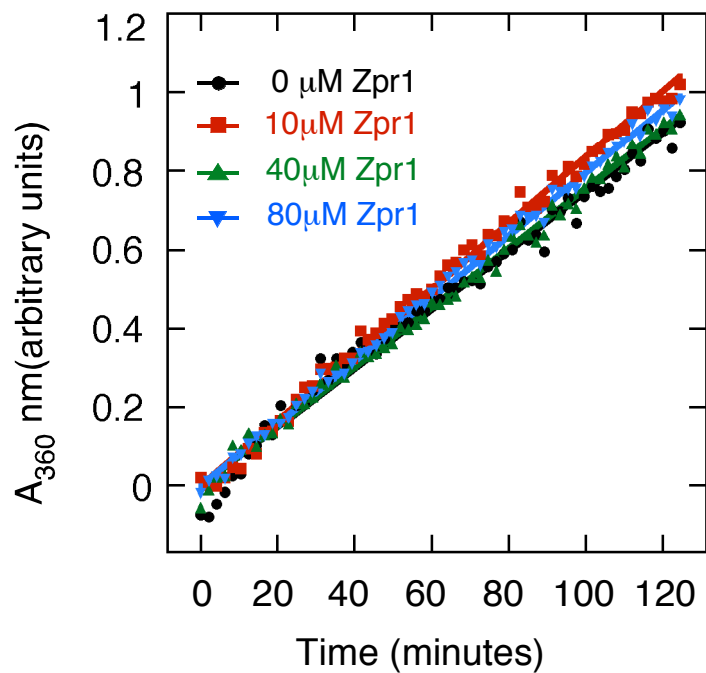**D**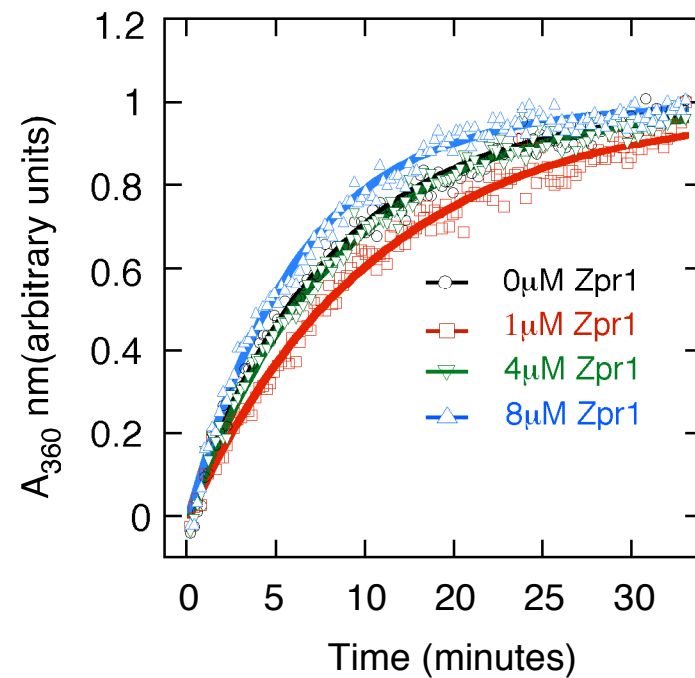

Supplement: pnas_0704915104_6.pdf [file pnas_0704915104_6.pdf]

A

## ZnF1-A domain

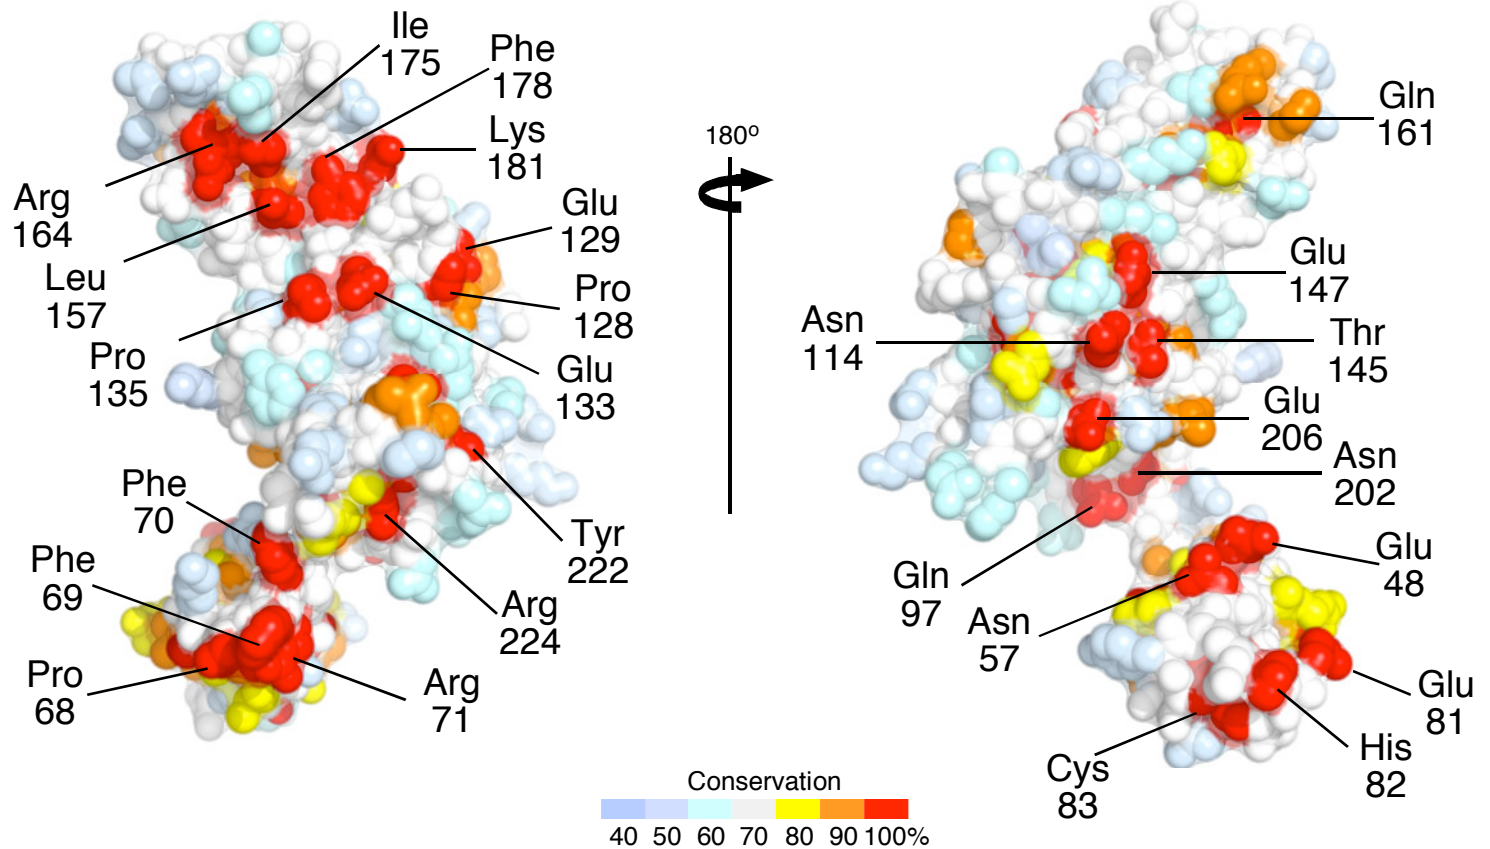

B

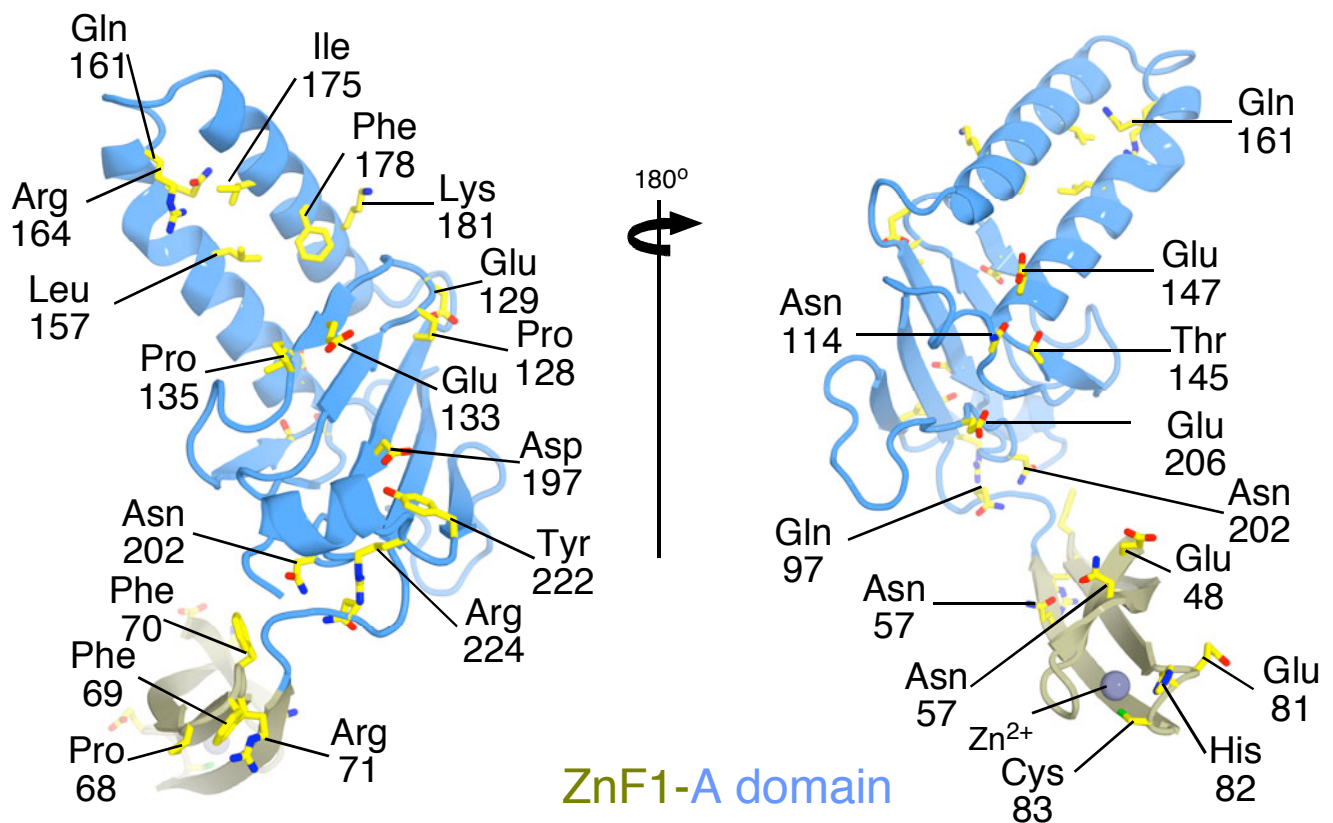

Supplement: pnas_0704915104_7.pdf [file pnas_0704915104_7.pdf]
